# Supplementary material for: Resolving whether inhalation of depleted uranium contributed to Gulf War Illness using high-sensitivity mass spectrometry
Source: PubMed Central journal article supplement (PMC7893152; doi:10.1038/s41598-021-82535-3), 2021-02-18
Supplement: 41598_2021_82535_MOESM2_ESM.pdf [file 41598_2021_82535_MOESM2_ESM.pdf]

**Table S3. U isotope measurements of samples**

| Sample Name                 | <sup>238</sup> U n g/kg | 24h U excretion | n g U/g creatinine | <sup>238</sup> U intensity (cps) | <sup>234</sup> U / <sup>238</sup> U | ±       | <sup>235</sup> U / <sup>238</sup> U | ±       | <sup>236</sup> U / <sup>238</sup> U | ±       | <sup>238</sup> U / <sup>235</sup> U | ± 2sd | InNI study# | Group φφ | DU Level <sup>SS</sup> |
|-----------------------------|-------------------------|-----------------|--------------------|----------------------------------|-------------------------------------|---------|-------------------------------------|---------|-------------------------------------|---------|-------------------------------------|-------|-------------|----------|------------------------|
| <i>Study Cohort samples</i> |                         |                 |                    |                                  |                                     |         |                                     |         |                                     |         |                                     |       |             |          |                        |
| GWS 0041                    | 3.1                     | 6.19            | 2.89               | 1.49E+07                         | 6.44E-05                            | 6.1E-07 | 7.29E-03                            | 1.6E-05 | <LOD                                |         | 137.1                               | 0.6   | 2           | -1       | 4                      |
| GWN-0074                    | 0.8                     | 2.02            | 0.85               | 9.48E+05                         | 9.17E-05                            | 3.8E-06 | 7.29E-03                            | 4.7E-05 | <LOD                                |         | 137.1                               | 1.8   | 3           | -1       | 4                      |
| GWN-0067                    | 0.3                     | 0.65            | 0.23               | 2.58E+05                         | 9.63E-05                            | 5.5E-06 | 7.32E-03                            | 6.9E-05 | <LOD                                |         | 136.5                               | 2.6   | 3           | -1       | 4                      |
| GWN-0071                    | 0.2                     | 0.24            | 0.19               | 2.19E+05                         | 7.12E-05                            | 1.1E-05 | 7.36E-03                            | 1.1E-04 | <LOD                                |         | 135.9                               | 4.0   | 3           | -1       | 4                      |
| GWN-0069                    | 0.5                     | 0.83            | 0.39               | 1.01E+06                         | 8.96E-05                            | 3.7E-06 | 7.29E-03                            | 5.5E-05 | <LOD                                |         | 137.2                               | 2.1   | 3           | -1       | 4                      |
| GWN-0065                    | 2.2                     | 10.43           | 5.83               | 1.34E+06                         | 9.16E-05                            | 2.7E-06 | 7.28E-03                            | 5.6E-05 | <LOD                                |         | 137.3                               | 2.1   | 3           | -1       | 4                      |
| GWS 0036                    | 0.8                     | 1.27            | 0.87               | 4.90E+06                         | 6.17E-05                            | 2.8E-06 | 7.27E-03                            | 2.6E-05 | <LOD                                |         | 137.5                               | 1.0   | 2           | -1       | 4                      |
| GWN-0076                    | 3.8                     | 8.08            | 7.15               | 6.78E+06                         | 6.14E-05                            | 2.3E-06 | 7.27E-03                            | 3.7E-05 | <LOD                                |         | 137.6                               | 1.4   | 3           | -1       | 4                      |
| GWS-0017                    | 4.3                     | 11.22           | 7.38               | 7.48E+06                         | 1.03E-04                            | 9.5E-07 | 7.26E-03                            | 2.4E-05 | <LOD                                |         | 137.8                               | 0.9   | 2           | -1       | 4                      |
| GWN-0063                    | 0.5                     | 0.75            | 0.25               | 3.42E+05                         | 1.09E-04                            | 3.1E-06 | 7.26E-03                            | 6.4E-05 | <LOD                                |         | 137.8                               | 2.4   | 3           | -1       | 4                      |
| GWN-0066                    | 1.6                     | 2.47            | 0.97               | 2.24E+06                         | 6.84E-05                            | 2.0E-06 | 7.26E-03                            | 3.4E-05 | <LOD                                |         | 137.8                               | 1.3   | 3           | -1       | 4                      |
| GWN-0087                    | 2.0                     | 3.48            | 1.98               | 4.21E+06                         | 1.05E-04                            | 1.9E-06 | 7.26E-03                            | 2.1E-05 | 3.8E-06                             | 6.8E-07 | 137.8                               | 0.8   | 3           | -1       | 4                      |
| GWN-0092                    | 0.9                     | 1.47            | 0.75               | 1.82E+06                         | 6.58E-05                            | 3.5E-06 | 7.25E-03                            | 3.9E-05 | <LOD                                |         | 137.9                               | 1.5   | 3           | -1       |                        |
| GWN-0073                    | 0.8                     | 2.73            | 1.63               | 1.39E+06                         | 6.65E-05                            | 3.9E-06 | 7.25E-03                            | 4.9E-05 | <LOD                                |         | 137.9                               | 1.9   | 3           | -1       | 4                      |
| GWN-0059                    | 3.0                     | 9.76            | 4.38               | 3.87E+06                         | 1.50E-04                            | 2.5E-06 | 7.25E-03                            | 2.8E-05 | <LOD                                |         | 138.0                               | 1.1   | 3           | -1       | 4                      |
| GWS-0049                    | 4.0                     | 5.99            | 2.67               | 2.75E+06                         | 6.43E-05                            | 1.3E-06 | 7.25E-03                            | 2.6E-05 | <LOD                                |         | 138.0                               | 1.0   | 2           | -1       | 4                      |
| GWN-0085                    | 13.4                    | 30.16           | 10.81              | 1.51E+07                         | 6.75E-05                            | 2.2E-06 | 7.25E-03                            | 3.6E-05 | <LOD                                |         | 138.0                               | 1.4   | 3           | -1       | 4                      |
| GWN-0061                    | 0.6                     | 1.94            | 1.25               | 7.42E+05                         | 8.95E-05                            | 3.6E-06 | 7.25E-03                            | 5.1E-05 | <LOD                                |         | 138.0                               | 1.9   | 3           | -1       | 4                      |
| GWN-0064                    | 0.8                     | 2.53            | 2.13               | 8.11E+05                         | 7.76E-05                            | 3.8E-06 | 7.24E-03                            | 3.6E-05 | <LOD                                |         | 138.1                               | 1.4   | 3           | -1       | 4                      |
| GWS-0014                    | 0.5                     | 1.03            | 0.47               | 8.92E+05                         | 8.02E-05                            | 3.8E-06 | 7.22E-03                            | 4.2E-05 | <LOD                                |         | 138.4                               | 1.6   | 2           | -1       | 4                      |
| GWS-0029                    | 0.1                     | 0.17            | 0.09               | 1.22E+05                         | 7.97E-05                            | 1.5E-05 | 7.22E-03                            | 2.3E-04 | <LOD                                |         | 138.4                               | 8.8   | 2           | -1       | 4                      |
| GWN-0014                    | 0.2                     | 0.32            | 0.14               | 3.78E+05                         | 9.83E-05                            | 6.9E-06 | 7.36E-03                            | 6.1E-05 | <LOD                                |         | 135.9                               | 2.3   | 3           | 0        | 4                      |
| GWN-0048                    | 0.4                     | 0.71            | 0.30               | 5.88E+05                         | 8.76E-05                            | 4.4E-06 | 7.34E-03                            | 6.7E-05 | <LOD                                |         | 136.2                               | 2.5   | 3           | 0        | 4                      |
| GWN-0070                    | 3.4                     | 8.93            | 1.96               | 2.01E+06                         | 6.72E-05                            | 2.4E-06 | 7.29E-03                            | 3.7E-05 | <LOD                                |         | 137.2                               | 1.4   | 3           | 0        | 4                      |
| GWN-0023                    | 2.1                     | 6.13            | 3.46               | 1.56E+06                         | 6.34E-05                            | 1.2E-06 | 7.28E-03                            | 2.9E-05 | <LOD                                |         | 137.4                               | 1.1   | 3           | 0        | 4                      |
| GWN-0037                    | 6.8                     | 11.86           | 6.11               | 5.24E+06                         | 6.21E-05                            | 8.6E-07 | 7.28E-03                            | 3.1E-05 | <LOD                                |         | 137.4                               | 1.2   | 3           | 0        | 4                      |
| GWS-0019                    | 0.9                     | 2.56            | 1.02               | 2.02E+06                         | 8.54E-05                            | 2.1E-06 | 7.28E-03                            | 2.8E-05 | <LOD                                |         | 137.4                               | 1.1   | 2           | 0        | 4                      |
| GWS-0003                    | 63.2                    | 96.43           | 54.48              | 3.58E+07                         | 8.58E-05                            | 3.5E-07 | 7.28E-03                            | 1.9E-05 | 4.3E-07                             | 3.0E-07 | 137.4                               | 0.7   | 1           | 0        |                        |
| GWS-0005                    | 1.9                     | 4.06            | 2.90               | 1.23E+06                         | 7.61E-05                            | 1.6E-06 | 7.27E-03                            | 1.4E-05 | <LOD                                |         | 137.5                               | 0.5   | 2           | 0        | 4                      |
| GWS 0035                    | 20.7                    | 63.39           | 35.02              | 4.12E+07                         | 5.41E-05                            | 4.5E-07 | 7.27E-03                            | 9.4E-06 | 1.5E-06                             | 2.8E-07 | 137.6                               | 0.4   | 2           | 0        | 4                      |
| GWS-0023                    | 3.3                     | 3.87            | 2.49               | 4.37E+06                         | 7.33E-05                            | 1.4E-06 | 7.27E-03                            | 3.1E-05 | <LOD                                |         | 137.6                               | 1.2   | 2           | 0        |                        |
| GWS-0006                    | 1.7                     | 3.73            | 2.16               | 1.58E+06                         | 6.89E-05                            | 1.8E-06 | 7.26E-03                            | 1.4E-05 | <LOD                                |         | 137.7                               | 0.5   | 2           | 0        | 4                      |
| GWN-0078                    | 0.4                     | 0.43            | 0.19               | 4.09E+05                         | 9.34E-05                            | 6.0E-06 | 7.26E-03                            | 7.9E-05 | <LOD                                |         | 137.7                               | 3.0   | 3           | 0        | 4                      |
| GWN-0055                    | 1.7                     | 3.22            | 1.77               | 3.38E+06                         | 7.45E-05                            | 1.7E-06 | 7.26E-03                            | 3.4E-05 | <LOD                                |         | 137.7                               | 1.3   | 3           | 0        | 3                      |
| GWN-0041                    | 2.6                     | 7.90            | 5.25               | 5.52E+06                         | 6.27E-05                            | 1.3E-06 | 7.25E-03                            | 2.3E-05 | <LOD                                |         | 137.8                               | 0.9   | 3           | 0        | 4                      |
| GWN-0020                    | 13.0                    | 19.49           | 11.36              | 2.08E+07                         | 6.29E-05                            | 6.4E-07 | 7.25E-03                            | 3.3E-05 | <LOD                                |         | 137.9                               | 1.3   | 3           | 0        | 4                      |
| GWN-0052                    | 2.1                     | 6.60            | 2.47               | 2.71E+06                         | 1.04E-04                            | 1.4E-06 | 7.25E-03                            | 2.9E-05 | <LOD                                |         | 137.9                               | 1.1   | 3           | 0        | 4                      |
| GWN-0050                    | 4.9                     | 13.60           | 6.07               | 7.29E+06                         | 7.01E-05                            | 9.1E-07 | 7.25E-03                            | 3.1E-05 | <LOD                                |         | 137.9                               | 1.2   | 3           | 0        | 1                      |
| GWS-0058                    | 2.7                     | 9.33            | 4.91               | 5.21E+05                         | 6.70E-05                            | 1.8E-06 | 7.24E-03                            | 3.1E-05 | <LOD                                |         | 138.1                               | 1.2   | 2           | 0        | 4                      |
| GWN-0060                    | 1.5                     | 2.76            | 1.61               | 1.67E+06                         | 6.75E-05                            | 2.3E-06 | 7.24E-03                            | 3.3E-05 | <LOD                                |         | 138.1                               | 1.3   | 3           | 0        | 3                      |
| GWN-0053                    | 11.6                    | 15.65           | 5.92               | 2.18E+07                         | 6.29E-05                            | 6.3E-07 | 7.24E-03                            | 3.4E-05 | <LOD                                |         | 138.1                               | 1.3   | 3           | 0        | 2                      |
| GWS-0011                    | 0.2                     | 0.76            | 0.37               | 5.32E+05                         | 8.66E-05                            | 6.5E-06 | 7.24E-03                            | 6.9E-05 | <LOD                                |         | 138.1                               | 2.6   | 2           | 0        | 4                      |
| GWN-0046                    | 2.4                     | 2.96            | 1.51               | 2.83E+06                         | 7.33E-05                            | 1.5E-06 | 7.24E-03                            | 3.1E-05 | <LOD                                |         | 138.2                               | 1.2   | 3           | 0        | 4                      |
| GWS-0015                    | 0.7                     | 1.14            | 0.78               | 1.60E+06                         | 7.37E-05                            | 2.9E-06 | 7.23E-03                            | 3.7E-05 | <LOD                                |         | 138.3                               | 1.4   | 2           | 0        | 4                      |
| GWS-0030                    | 2.7                     | 3.97            | 2.17               | 3.22E+06                         | 6.88E-05                            | 2.4E-06 | 7.22E-03                            | 4.2E-05 | <LOD                                |         | 138.4                               | 1.6   | 2           | 0        | 4                      |
| GWS 0028                    | 0.4                     | 1.16            | 0.45               | 1.74E+06                         | 6.97E-05                            | 5.0E-06 | 7.22E-03                            | 4.8E-05 | <LOD                                |         | 138.4                               | 1.8   | 2           | 0        | 3                      |

**Table S3. U isotope measurements of samples**

| Sample Name | <sup>238</sup> U n g/kg | 24h U excretion | n g U/g creatinine | <sup>238</sup> U intensity (cps) | <sup>234</sup> U / <sup>238</sup> U | ±       | <sup>235</sup> U / <sup>238</sup> U | ±       | <sup>236</sup> U / <sup>238</sup> U | ± | <sup>238</sup> U / <sup>235</sup> U | ± 2sd | InNI study# | Group φφ | DU Level <sup>SS</sup> |
|-------------|-------------------------|-----------------|--------------------|----------------------------------|-------------------------------------|---------|-------------------------------------|---------|-------------------------------------|---|-------------------------------------|-------|-------------|----------|------------------------|
| GWN-0042    | 0.5                     | 0.85            | 0.40               | 8.29E+05                         | 8.01E-05                            | 4.3E-06 | 7.23E-03                            | 6.7E-05 | <LOD                                |   | 138.4                               | 2.6   | 3           | 0        | 4                      |
| GWN-0051    | 0.3                     | 0.41            | 0.18               | 2.81E+05                         | 1.01E-04                            | 5.0E-06 | 7.18E-03                            | 1.1E-04 | <LOD                                |   | 139.2                               | 4.1   | 3           | 0        | 4                      |
| GWN-0035    | 1.1                     | 1.20            | 0.86               | 1.48E+06                         | 7.94E-05                            | 2.3E-06 | 7.29E-03                            | 3.2E-05 | <LOD                                |   | 137.1                               | 1.2   | 3           | 1        | 1                      |
| GWN-0031    | 1.0                     | 1.38            | 0.85               | 1.03E+06                         | 7.15E-05                            | 1.9E-06 | 7.30E-03                            | 3.3E-05 | <LOD                                |   | 137.0                               | 1.2   | 3           | 1        | 3                      |
| GWN-0005    | 1.6                     | 3.93            | 1.97               | 2.68E+06                         | 6.82E-05                            | 1.8E-06 | 7.29E-03                            | 3.6E-05 | <LOD                                |   | 137.2                               | 1.4   | 3           | 1        | 4                      |
| GWS-0026    | 0.3                     | 1.64            | 0.69               | 4.09E+05                         | 7.56E-05                            | 1.3E-05 | 7.29E-03                            | 5.1E-05 | <LOD                                |   | 137.1                               | 1.9   | 2           | 1        | 4                      |
| GWS-0027    | 0.3                     | 0.64            | 0.30               | 1.79E+05                         | 6.42E-05                            | 9.5E-06 | 7.33E-03                            | 8.7E-05 | <LOD                                |   | 136.4                               | 3.2   | 2           | 1        | 4                      |
| GWN-0089    | 0.2                     | 0.22            | 0.13               | 3.79E+05                         | 6.73E-05                            | 1.2E-05 | 7.32E-03                            | 1.2E-04 | <LOD                                |   | 136.6                               | 4.4   | 3           | 1        | 4                      |
| GWN-0007    | 1.4                     | 1.45            | 1.07               | 2.18E+06                         | 7.12E-05                            | 1.6E-06 | 7.29E-03                            | 3.4E-05 | <LOD                                |   | 137.2                               | 1.3   | 3           | 1        | 1                      |
| GWS-0053    | 1.3                     | 4.11            | 1.28               | 1.22E+06                         | 6.36E-05                            | 1.8E-06 | 7.28E-03                            | 2.4E-05 | <LOD                                |   | 137.3                               | 0.9   | 2           | 1        | 3                      |
| GWN-0006    | 1.1                     | 2.96            | 1.80               | 7.52E+05                         | 8.34E-05                            | 4.2E-06 | 7.28E-03                            | 3.4E-05 | <LOD                                |   | 137.3                               | 1.3   | 3           | 1        | 3                      |
| GWS-0054    | 0.8                     | 2.38            | 0.97               | 8.45E+05                         | 6.51E-05                            | 2.7E-06 | 7.28E-03                            | 3.6E-05 | <LOD                                |   | 137.4                               | 1.4   | 2           | 1        | 4                      |
| GWN-0029    | 3.0                     | 8.27            | 8.99               | 2.91E+06                         | 6.56E-05                            | 1.1E-06 | 7.28E-03                            | 3.0E-05 | <LOD                                |   | 137.4                               | 1.1   | 3           | 1        | 3                      |
| GWS-0046    | 1.4                     | 3.21            | 1.43               | 6.48E+05                         | 6.36E-05                            | 3.0E-06 | 7.28E-03                            | 3.4E-05 | <LOD                                |   | 137.4                               | 1.3   | 2           | 1        | 4                      |
| GWN-0056    | 1.2                     | 1.79            | 1.38               | 1.50E+06                         | 7.22E-05                            | 2.4E-06 | 7.28E-03                            | 3.4E-05 | <LOD                                |   | 137.5                               | 1.3   | 3           | 1        | 4                      |
| GWN-0034    | 6.1                     | 5.52            | 4.70               | 1.03E+07                         | 8.29E-05                            | 1.0E-06 | 7.27E-03                            | 2.9E-05 | <LOD                                |   | 137.5                               | 1.1   | 3           | 1        | 4                      |
| GWN-0044    | 0.8                     | 1.10            | 0.62               | 1.46E+06                         | 7.50E-05                            | 2.8E-06 | 7.27E-03                            | 4.1E-05 | <LOD                                |   | 137.5                               | 1.5   | 3           | 1        | 2                      |
| GWN-0009    | 2.5                     | 3.65            | 2.91               | 3.15E+06                         | 1.61E-04                            | 2.6E-06 | 7.27E-03                            | 3.4E-05 | <LOD                                |   | 137.5                               | 1.3   | 3           | 1        | 4                      |
| GWS-0055    | 0.3                     | 0.52            | 0.19               | 2.68E+05                         | 7.34E-05                            | 5.5E-06 | 7.27E-03                            | 5.1E-05 | <LOD                                |   | 137.5                               | 1.9   | 2           | 1        | 2                      |
| GWN-0049    | 4.6                     | 13.26           | 6.38               | 7.46E+06                         | 6.67E-05                            | 9.5E-07 | 7.27E-03                            | 2.8E-05 | <LOD                                |   | 137.5                               | 1.0   | 3           | 1        | 3                      |
| GWN-0054    | 0.5                     | 0.88            | 0.54               | 1.14E+06                         | 7.36E-05                            | 4.2E-06 | 7.27E-03                            | 5.1E-05 | <LOD                                |   | 137.5                               | 1.9   | 3           | 1        | 4                      |
| GWS-0045    | 3.4                     | 7.28            | 2.84               | 1.01E+07                         | 6.02E-05                            | 1.0E-06 | 7.27E-03                            | 1.3E-05 | <LOD                                |   | 137.6                               | 0.5   | 2           | 1        | 4                      |
| GWS 0022    | 2.4                     | 8.76            | 3.51               | 3.82E+06                         | 7.03E-05                            | 1.1E-06 | 7.27E-03                            | 1.6E-05 | <LOD                                |   | 137.6                               | 0.6   | 2           | 1        | 4                      |
| GWS-0050    | 4.2                     | 5.71            | 4.08               | 5.49E+06                         | 5.87E-05                            | 1.1E-06 | 7.26E-03                            | 2.1E-05 | <LOD                                |   | 137.7                               | 0.8   | 2           | 1        | 4                      |
| GWN-0096    | 1.1                     | 1.41            | 1.47               | 1.16E+06                         | 6.27E-05                            | 2.5E-06 | 7.26E-03                            | 3.8E-05 | <LOD                                |   | 137.7                               | 1.4   | 3           | 1        | 4                      |
| GWN-0039    | 1.6                     | 4.68            | 2.29               | 1.68E+06                         | 7.81E-05                            | 1.6E-06 | 7.26E-03                            | 2.9E-05 | <LOD                                |   | 137.7                               | 1.1   | 3           | 1        | 2                      |
| GWN-0081    | 1.9                     | 2.32            | 1.35               | 2.71E+06                         | 7.12E-05                            | 3.1E-06 | 7.26E-03                            | 4.4E-05 | <LOD                                |   | 137.8                               | 1.7   | 3           | 1        | 1                      |
| GWN-0093    | 1.7                     | 6.50            | 3.56               | 1.90E+06                         | 7.15E-05                            | 2.1E-06 | 7.25E-03                            | 2.4E-05 | <LOD                                |   | 137.9                               | 0.9   | 3           | 1        | 4                      |
| GWN-0088    | 1.1                     | 1.27            | 0.57               | 1.64E+06                         | 6.72E-05                            | 2.5E-06 | 7.25E-03                            | 3.2E-05 | <LOD                                |   | 137.9                               | 1.2   | 3           | 1        | 3                      |
| GWS-0034    | 6.7                     | 12.55           | 7.38               | 5.54E+06                         | 7.72E-05                            | 1.4E-06 | 7.25E-03                            | 4.0E-05 | <LOD                                |   | 137.9                               | 1.5   | 2           | 1        | 4                      |
| GWN-0011    | 2.7                     | 5.57            | 2.85               | 6.62E+06                         | 7.20E-05                            | 1.4E-06 | 7.22E-03                            | 3.5E-05 | <LOD                                |   | 138.5                               | 1.3   | 3           | 1        | 4                      |
| GWN-0082    | 0.8                     | 2.19            | 1.27               | 1.38E+06                         | 1.01E-04                            | 4.1E-06 | 7.23E-03                            | 4.9E-05 | <LOD                                |   | 138.4                               | 1.9   | 3           | 1        | 4                      |
| GWN-0080    | 0.6                     | 1.05            | 0.42               | 4.71E+05                         | 7.37E-05                            | 7.8E-06 | 7.23E-03                            | 5.1E-05 | <LOD                                |   | 138.2                               | 2.0   | 3           | 1        | 1                      |
| GWN-0003    | 0.9                     | 1.84            | 1.05               | 8.82E+05                         | 1.14E-04                            | 3.0E-06 | 7.31E-03                            | 3.5E-05 | <LOD                                |   | 136.8                               | 1.3   | 3           | 2        | 4                      |
| GWN-0045    | 0.9                     | 1.60            | 0.98               | 1.84E+06                         | 7.71E-05                            | 2.7E-06 | 7.33E-03                            | 3.7E-05 | <LOD                                |   | 136.4                               | 1.4   | 3           | 2        | 4                      |
| GWN-0008    | 0.5                     | 3.01            | 1.94               | 1.13E+06                         | 7.28E-05                            | 3.1E-06 | 7.29E-03                            | 3.8E-05 | <LOD                                |   | 137.1                               | 1.4   | 3           | 2        | 4                      |
| GWN-0086    | 0.5                     | 1.17            | 0.44               | 9.13E+05                         | 7.50E-05                            | 3.9E-06 | 7.30E-03                            | 4.6E-05 | <LOD                                |   | 137.0                               | 1.7   | 3           | 2        | 4                      |
| GWN-0028    | 3.5                     | 4.14            | 1.87               | 1.81E+06                         | 8.84E-05                            | 3.6E-06 | 7.29E-03                            | 3.2E-05 | <LOD                                |   | 137.2                               | 1.2   | 3           | 2        | 4                      |
| GWN-0047    | 0.8                     | 2.40            | 1.34               | 1.13E+06                         | 9.32E-05                            | 2.6E-06 | 7.29E-03                            | 6.4E-05 | <LOD                                |   | 137.3                               | 2.4   | 3           | 2        | 4                      |
| GWS-0044    | 1.0                     | 2.77            | 1.54               | 1.97E+06                         | 8.40E-05                            | 2.0E-06 | 7.28E-03                            | 1.5E-05 | <LOD                                |   | 137.3                               | 0.6   | 2           | 2        | 3                      |
| GWN-0021    | 12.7                    | 18.95           | 16.63              | 1.07E+07                         | 6.94E-05                            | 7.7E-07 | 7.28E-03                            | 3.4E-05 | <LOD                                |   | 137.3                               | 1.3   | 3           | 2        | 3                      |
| GWS-0020    | 5.4                     | 5.70            | 3.17               | 7.34E+05                         | 8.87E-05                            | 1.8E-06 | 7.28E-03                            | 3.1E-05 | <LOD                                |   | 137.4                               | 1.2   | 2           | 2        | 3                      |
| GWN-0024    | 2.1                     | 4.69            | 2.02               | 1.52E+06                         | 6.78E-05                            | 1.5E-06 | 7.28E-03                            | 3.1E-05 | <LOD                                |   | 137.4                               | 1.2   | 3           | 2        | 2                      |
| GWN-0072    | 0.4                     | 2.15            | 0.70               | 8.38E+05                         | 6.54E-05                            | 6.1E-06 | 7.28E-03                            | 6.7E-05 | <LOD                                |   | 137.4                               | 2.5   | 3           | 2        | 4                      |
| GWS-0059    | 2.7                     | 8.60            | 4.39               | 3.47E+06                         | 5.85E-05                            | 1.2E-06 | 7.28E-03                            | 2.3E-05 | <LOD                                |   | 137.4                               | 0.9   | 2           | 2        | 4                      |
| GWS-0004    | 1.3                     | 3.69            | 2.27               | 1.65E+06                         | 6.59E-05                            | 1.9E-06 | 7.28E-03                            | 2.6E-05 | <LOD                                |   | 137.4                               | 1.0   | 2           | 2        | 2                      |
| GWN-0057    | 8.2                     | 28.76           | 23.87              | 1.65E+07                         | 9.53E-05                            | 4.7E-07 | 7.28E-03                            | 1.1E-05 | <LOD                                |   | 137.4                               | 0.4   | 3           | 2        | 3                      |
| GWN-0025    | 13.6                    | 6.82            | 5.41               | 1.73E+07                         | 6.65E-05                            | 8.2E-07 | 7.28E-03                            | 2.9E-05 | <LOD                                |   | 137.4                               | 1.1   | 3           | 2        | 4                      |

**Table S3. U isotope measurements of samples**

| Sample Name | <sup>238</sup> U n g/kg | 24h U excretion | n g U/g creatinine | <sup>238</sup> U intensity (cps) | <sup>234</sup> U / <sup>238</sup> U | ±       | <sup>235</sup> U / <sup>238</sup> U | ±       | <sup>236</sup> U / <sup>238</sup> U | ±       | <sup>238</sup> U / <sup>235</sup> U | ± 2sd | InNI study# | Group φφ | DU Level <sup>SS</sup> |
|-------------|-------------------------|-----------------|--------------------|----------------------------------|-------------------------------------|---------|-------------------------------------|---------|-------------------------------------|---------|-------------------------------------|-------|-------------|----------|------------------------|
| GWN-0036    | 4.1                     | 3.76            | 2.40               | 5.89E+06                         | 6.87E-05                            | 8.5E-07 | 7.27E-03                            | 3.3E-05 | <LOD                                |         | 137.5                               | 1.3   | 3           | 2        | 4                      |
| GWS-0009    | 1.6                     | 3.45            | 1.38               | 2.15E+06                         | 9.65E-05                            | 1.9E-06 | 7.27E-03                            | 2.7E-05 | 5.1E-06                             | 1.3E-06 | 137.5                               | 1.0   | 2           | 2        | 4                      |
| GWN-0097    | 6.7                     | 16.80           | 9.08               | 1.40E+06                         | 6.10E-05                            | 3.2E-06 | 7.27E-03                            | 4.6E-05 | <LOD                                |         | 137.5                               | 1.7   | 3           | 2        | 4                      |
| GWS-0060    | 3.0                     | 9.19            | 3.08               | 3.29E+06                         | 8.28E-05                            | 1.4E-06 | 7.27E-03                            | 2.4E-05 | <LOD                                |         | 137.5                               | 0.9   | 2           | 2        | 4                      |
| GWS-0057    | 10.7                    | 21.86           | 13.75              | 1.90E+07                         | 5.44E-05                            | 7.9E-07 | 7.27E-03                            | 2.2E-05 | <LOD                                |         | 137.5                               | 0.8   | 2           | 2        | 4                      |
| GWN-0026    | 3.2                     | 6.96            | 2.6                | 1677008.3                        | 7.72E-05                            | 1.8E-06 | 7.27E-03                            | 3.5E-05 | <LOD                                |         | 137.6                               | 1.3   | 3           | 2        | 3                      |
| GWN-0027    | 2.1                     | 4.74            | 2.37               | 1.94E+06                         | 9.22E-05                            | 2.2E-06 | 7.27E-03                            | 4.0E-05 | <LOD                                |         | 137.6                               | 1.5   | 3           | 2        | 1                      |
| GWN-0062    | 16.3                    | 26.52           | 6.96               | 3.93E+07                         | 6.82E-05                            | 8.1E-07 | 7.27E-03                            | 2.6E-05 | <LOD                                |         | 137.6                               | 1.0   | 3           | 2        | 3                      |
| GWS-0013    | 1.7                     | 2.86            | 1.68               | 2.96E+06                         | 7.74E-05                            | 1.3E-06 | 7.26E-03                            | 2.5E-05 | <LOD                                |         | 137.7                               | 0.9   | 2           | 2        | 4                      |
| GWS-0016    | 3.0                     | 7.12            | 4.60               | 3.31E+06                         | 7.45E-05                            | 9.8E-07 | 7.26E-03                            | 2.3E-05 | <LOD                                |         | 137.7                               | 0.9   | 2           | 2        | 3                      |
| GWN-0018    | 3.3                     | 9.26            | 4.04               | 4.60E+06                         | 6.62E-05                            | 1.3E-06 | 7.26E-03                            | 3.6E-05 | <LOD                                |         | 137.7                               | 1.4   | 3           | 2        | 2                      |
| GWN-0013    | 1.1                     | 2.09            | 1.04               | 2.67E+06                         | 7.96E-05                            | 1.7E-06 | 7.26E-03                            | 3.6E-05 | <LOD                                |         | 137.8                               | 1.4   | 3           | 2        | 2                      |
| GWS-0012    | 0.7                     | 2.29            | 0.62               | 8.55E+05                         | 7.28E-05                            | 2.7E-06 | 7.26E-03                            | 3.4E-05 | <LOD                                |         | 137.8                               | 1.3   | 2           | 2        | 2                      |
| GWN-0079    | 2.8                     | 7.77            | 4.56               | 4.07E+06                         | 6.32E-05                            | 2.3E-06 | 7.25E-03                            | 3.9E-05 | <LOD                                |         | 137.9                               | 1.5   | 3           | 2        | 2                      |
| GWN-0094    | 0.9                     | 0.74            | 0.55               | 1.37E+06                         | 7.03E-05                            | 3.1E-06 | 7.25E-03                            | 3.6E-05 | <LOD                                |         | 137.9                               | 1.4   | 3           | 2        | 4                      |
| GWN-0012    | 0.9                     | 1.39            | 0.84               | 1.32E+06                         | 7.33E-05                            | 2.2E-06 | 7.25E-03                            | 3.7E-05 | <LOD                                |         | 137.9                               | 1.4   | 3           | 2        | 3                      |
| GWS-0007    | 1.3                     | 3.57            | 2.09               | 4.97E+05                         | 9.01E-05                            | 3.8E-06 | 7.24E-03                            | 2.7E-05 | <LOD                                |         | 138.0                               | 1.0   | 2           | 2        | 4                      |
| GWN-0095    | 3.3                     | 6.28            | 4.52               | 2.33E+06                         | 5.53E-05                            | 1.4E-06 | 7.24E-03                            | 2.9E-05 | <LOD                                |         | 138.0                               | 1.1   | 3           | 2        | 4                      |
| GWS-0031    | 8.9                     | 16.52           | 7.13               | 9.72E+05                         | 6.60E-05                            | 2.6E-06 | 7.24E-03                            | 3.3E-05 | <LOD                                |         | 138.1                               | 1.3   | 2           | 2        | 3                      |
| GWS 0032    | 0.5                     | 2.00            | 0.92               | 4.36E+06                         | 6.56E-05                            | 3.9E-06 | 7.24E-03                            | 3.5E-05 | <LOD                                |         | 138.1                               | 1.3   | 2           | 2        | 4                      |
| GWS-0010    | 0.4                     | 0.76            | 0.58               | 7.91E+05                         | 8.25E-05                            | 4.1E-06 | 7.24E-03                            | 4.4E-05 | <LOD                                |         | 138.1                               | 1.7   | 2           | 2        | 4                      |
| GWS-0018    | 0.6                     | 0.70            | 0.88               | 1.12E+06                         | 7.83E-05                            | 2.9E-06 | 7.24E-03                            | 4.3E-05 | <LOD                                |         | 138.1                               | 1.7   | 2           | 2        | 4                      |
| GWS-0025    | 2.1                     | 5.23            | 2.50               | 6.14E+05                         | 6.97E-05                            | 2.9E-06 | 7.23E-03                            | 3.1E-05 | <LOD                                |         | 138.3                               | 1.2   | 2           | 2        | 3                      |
| GWN-0084    | 2.3                     | 5.86            | 3.66               | 3.87E+06                         | 9.25E-05                            | 3.1E-06 | 7.23E-03                            | 3.8E-05 | <LOD                                |         | 138.2                               | 1.4   | 3           | 2        | 4                      |
| GWN-0090    | 1.5                     | 3.56            | 1.75               | 1.47E+06                         | 7.28E-05                            | 3.3E-06 | 7.22E-03                            | 4.4E-05 | <LOD                                |         | 138.5                               | 1.7   | 3           | 2        | 3                      |
| GWS 0037    | 0.2                     | 0.90            | 0.46               | 1.17E+06                         | 1.29E-04                            | 2.2E-06 | 7.21E-03                            | 7.0E-05 | <LOD                                |         | 138.6                               | 2.7   | 2           | 2        | 3                      |
| GWS-0008    | 0.2                     | 0.94            | 0.51               | 5.05E+05                         | 1.36E-04                            | 6.3E-06 | 7.15E-03                            | 7.7E-05 | <LOD                                |         | 139.8                               | 3.0   | 2           | 2        | 4                      |
| GWS-0043    | 2.2                     | 7.73            | 4.86               | 4.93E+06                         | 6.45E-05                            | 1.3E-06 | 7.30E-03                            | 1.5E-05 | <LOD                                |         | 137.0                               | 0.6   | 2           | 3        | 4                      |
| GWS 0040    | 2.5                     | 4.73            | 3.67               | 1.18E+07                         | 6.41E-05                            | 7.2E-07 | 7.29E-03                            | 1.7E-05 | <LOD                                |         | 137.1                               | 0.6   | 2           | 3        | 4                      |
| GWN-0038    | 1.2                     | 3.15            | 1.95               | 1.06E+06                         | 8.12E-05                            | 2.1E-06 | 7.31E-03                            | 3.1E-05 | <LOD                                |         | 136.7                               | 1.1   | 3           | 3        | 4                      |
| GWS-0051    | 0.6                     | 2.02            | 0.84               | 8.34E+05                         | 5.14E-05                            | 3.3E-06 | 7.29E-03                            | 3.2E-05 | <LOD                                |         | 137.2                               | 1.2   | 2           | 3        | 3                      |
| GWS-0052    | 0.3                     | 0.69            | 0.59               | 4.90E+05                         | 6.56E-05                            | 4.8E-06 | 7.29E-03                            | 4.6E-05 | <LOD                                |         | 137.2                               | 1.7   | 2           | 3        | 4                      |
| GWS-0002    | 2.9                     | 6.37            | 2.73               | 2.73E+06                         | 7.20E-05                            | 1.6E-06 | 7.28E-03                            | 1.8E-05 | <LOD                                |         | 137.3                               | 0.7   | 1           | 3        | 3                      |
| GWS-0048    | 3.3                     | 6.55            | 3.34               | 4.26E+06                         | 6.05E-05                            | 1.2E-06 | 7.28E-03                            | 2.2E-05 | <LOD                                |         | 137.4                               | 0.8   | 2           | 3        | 3                      |
| GWN-0002    | 8.4                     | 12.62           | 6.61               | 8.95E+06                         | 5.90E-05                            | 7.2E-07 | 7.28E-03                            | 3.3E-05 | <LOD                                |         | 137.4                               | 1.3   | 3           | 3        | 4                      |
| GWS 0024    | 0.7                     | 1.59            | 0.70               | 1.14E+06                         | 7.18E-05                            | 4.8E-06 | 7.28E-03                            | 3.5E-05 | <LOD                                |         | 137.4                               | 1.3   | 2           | 3        | 4                      |
| GWN-0015    | 0.9                     | 1.39            | 0.53               | 1.32E+06                         | 8.06E-05                            | 2.9E-06 | 7.28E-03                            | 3.7E-05 | <LOD                                |         | 137.5                               | 1.4   | 3           | 3        | 3                      |
| GWN-0001    | 10.0                    | 15.07           | 15.70              | 1.75E+07                         | 7.79E-05                            | 1.2E-06 | 7.27E-03                            | 2.1E-05 | <LOD                                |         | 137.5                               | 0.8   | 3           | 3        | 4                      |
| GWN-0022    | 5.8                     | 8.04            | 4.17               | 4.26E+06                         | 6.94E-05                            | 1.1E-06 | 7.27E-03                            | 3.0E-05 | <LOD                                |         | 137.5                               | 1.1   | 3           | 3        | 2                      |
| GWN-0016    | 6.1                     | 11.47           | 5.03               | 2.91E+06                         | 6.21E-05                            | 1.4E-06 | 7.27E-03                            | 3.5E-05 | <LOD                                |         | 137.5                               | 1.3   | 3           | 3        | 4                      |
| GWN-0004    | 2.2                     | 7.64            | 3.01               | 3.05E+06                         | 7.90E-05                            | 1.3E-06 | 7.27E-03                            | 3.7E-05 | <LOD                                |         | 137.5                               | 1.4   | 3           | 3        | 2                      |
| GWN-0017    | 1.9                     | 3.02            | 2.84               | 1.94E+06                         | 7.06E-05                            | 1.5E-06 | 7.27E-03                            | 3.6E-05 | <LOD                                |         | 137.6                               | 1.4   | 3           | 3        | 4                      |
| GWN-0032    | 2.4                     | 8.03            | 2.37               | 3.16E+06                         | 6.95E-05                            | 1.2E-06 | 7.27E-03                            | 3.0E-05 | <LOD                                |         | 137.6                               | 1.1   | 3           | 3        | 1                      |
| GWS 0042    | 1.0                     | 1.30            | 0.79               | 5.02E+06                         | 6.30E-05                            | 1.6E-06 | 7.27E-03                            | 2.2E-05 | <LOD                                |         | 137.6                               | 0.8   | 2           | 3        | 2                      |
| GWN-0077    | 0.5                     | 0.93            | 0.55               | 5.52E+05                         | 7.92E-05                            | 8.5E-06 | 7.27E-03                            | 4.8E-05 | <LOD                                |         | 137.6                               | 1.8   | 3           | 3        | 4                      |
| GWN-0033    | 3.1                     | 2.30            | 3.08               | 3.13E+06                         | 8.27E-05                            | 1.5E-06 | 7.27E-03                            | 3.0E-05 | <LOD                                |         | 137.6                               | 1.1   | 3           | 3        | 2                      |
| GWS-0047    | 3.7                     | 10.08           | 4.69               | 4.71E+06                         | 6.03E-05                            | 1.1E-06 | 7.26E-03                            | 2.1E-05 | <LOD                                |         | 137.7                               | 0.8   | 2           | 3        | 4                      |
| GWN-0010    | 6.1                     | 7.88            | 4.13               | 1.78E+06                         | 7.01E-05                            | 2.4E-06 | 7.26E-03                            | 3.6E-05 | <LOD                                |         | 137.7                               | 1.4   | 3           | 3        | 4                      |

**Table S3. U isotope measurements of samples**

| Sample Name | <sup>238</sup> U n g/kg | 24h U excretion | n g U/g creatinine | <sup>238</sup> U intensity (cps) | <sup>234</sup> U / <sup>238</sup> U | ±       | <sup>235</sup> U / <sup>238</sup> U | ±       | <sup>236</sup> U / <sup>238</sup> U | ±       | <sup>238</sup> U / <sup>235</sup> U | ± 2sd | InNI study# | Group φφ | DU Level <sup>\$\$</sup> |
|-------------|-------------------------|-----------------|--------------------|----------------------------------|-------------------------------------|---------|-------------------------------------|---------|-------------------------------------|---------|-------------------------------------|-------|-------------|----------|--------------------------|
| GWS-0056    | 1.3                     | 3.44            | 1.38               | 2.46E+06                         | 6.78E-05                            | 1.9E-06 | 7.26E-03                            | 2.5E-05 | <LOD                                |         | 137.7                               | 0.9   | 2           | 3        | 4                        |
| GWN-0030    | 1.3                     | 2.13            | 1.23               | 1.34E+06                         | 7.98E-05                            | 1.9E-06 | 7.26E-03                            | 3.2E-05 | <LOD                                |         | 137.7                               | 1.2   | 3           | 3        | 3                        |
| GWN-0058    | 1.2                     | 3.23            | 1.54               | 6.05E+05                         | 8.20E-05                            | 2.6E-06 | 7.26E-03                            | 3.6E-05 | <LOD                                |         | 137.7                               | 1.4   | 3           | 3        | 4                        |
| GWN-0019    | 2.7                     | 4.58            | 1.78               | 3.61E+06                         | 7.70E-05                            | 1.4E-06 | 7.25E-03                            | 3.4E-05 | <LOD                                |         | 137.9                               | 1.3   | 3           | 3        | 2                        |
| GWN-0091    | 4.2                     | 11.58           | 6.99               | 3.30E+06                         | 8.86E-05                            | 3.4E-06 | 7.25E-03                            | 3.0E-05 | 9.0E-06                             | 1.1E-06 | 137.9                               | 1.2   | 3           | 3        | 2                        |
| GWN-0040    | 1.1                     | 1.76            | 0.91               | 1.02E+06                         | 7.47E-05                            | 3.0E-06 | 7.24E-03                            | 3.7E-05 | <LOD                                |         | 138.0                               | 1.4   | 3           | 3        | 3                        |
| GWN-0043    | 1.2                     | 3.87            | 1.30               | 3.42E+06                         | 7.08E-05                            | 1.8E-06 | 7.24E-03                            | 3.0E-05 | <LOD                                |         | 138.2                               | 1.1   | 3           | 3        | 4                        |
| GWN-0083    | 3.4                     | 10.13           | 4.42               | 5.74E+06                         | 6.32E-05                            | 2.3E-06 | 7.22E-03                            | 3.8E-05 | 5.1E-06                             | 6.3E-07 | 138.6                               | 1.5   | 3           | 3        | 4                        |
| GWN-0068    | 0.5                     | 0.83            | 0.35               | 5.47E+05                         | 7.52E-05                            | 4.2E-06 | 7.23E-03                            | 5.8E-05 | <LOD                                |         | 138.4                               | 2.2   | 3           | 3        | 2                        |
| GWS 0038    | 0.3                     | 0.88            | 0.41               | 1.20E+06                         | 8.31E-05                            | 4.0E-06 | 7.20E-03                            | 6.8E-05 | <LOD                                |         | 138.9                               | 2.6   | 2           | 3        | 4                        |
| GWN-0075    | 0.4                     | 0.60            | 0.34               | 5.11E+05                         | 8.23E-05                            | 5.3E-06 | 7.23E-03                            | 7.1E-05 | <LOD                                |         | 138.4                               | 2.7   | 3           | 3        | 4                        |
| GWS-0021    | 0.1                     | 0.44            | 0.16               | 1.99E+05                         | 1.22E-04                            | 1.3E-05 | 7.16E-03                            | 1.2E-04 | <LOD                                |         | 139.6                               | 4.7   | 2           | 3        | 4                        |

In-house urine reference samples (~1.4ppt)

|                |      |      |      |          |          |         |          |         |         |         |       |     |  |  |  |
|----------------|------|------|------|----------|----------|---------|----------|---------|---------|---------|-------|-----|--|--|--|
| #2 +0.5ng IRM  | 4.1  | 0.50 | 0.05 | 4.54E+06 | 5.95E-05 | 8.8E-07 | 7.29E-03 | 1.2E-05 | <LOD    |         | 137.2 | 0.4 |  |  |  |
| #3 +1ng IRMM   | 7.0  | 1.00 | 0.05 | 6.99E+06 | 5.91E-05 | 6.7E-07 | 7.28E-03 | 1.2E-05 | 1.5E-06 | 4.9E-07 | 137.4 | 0.4 |  |  |  |
| #4 +1.5ng IRM  | 12.9 | 1.50 | 0.05 | 1.41E+07 | 5.59E-05 | 4.0E-07 | 7.28E-03 | 1.0E-05 | <LOD    |         | 137.4 | 0.4 |  |  |  |
| #5             | 0.9  | 0.00 | 0.05 | 9.93E+05 | 6.78E-05 | 2.4E-06 | 7.28E-03 | 3.5E-05 | <LOD    |         | 137.3 | 1.3 |  |  |  |
| #6 +0.4ng IRM  | 3.3  | 0.40 | 0.05 | 2.50E+06 | 5.42E-05 | 1.4E-06 | 7.31E-03 | 2.6E-05 | <LOD    |         | 136.8 | 1.0 |  |  |  |
| #7 +0.8ng IRM  | 5.5  | 0.80 | 0.05 | 9.36E+06 | 5.76E-05 | 8.2E-07 | 7.32E-03 | 3.4E-05 | <LOD    |         | 136.5 | 1.3 |  |  |  |
| #8 +1.2ng IRM  | 8.1  | 1.20 | 0.05 | 7.81E+06 | 5.68E-05 | 1.0E-06 | 7.28E-03 | 3.3E-05 | <LOD    |         | 137.4 | 1.2 |  |  |  |
| #9             | 1.4  | 0.00 | 0.05 | 2.52E+06 | 8.21E-05 | 2.0E-06 | 7.26E-03 | 3.0E-05 | <LOD    |         | 137.8 | 1.2 |  |  |  |
| #10 +0.4ng IRM | 4.1  | 0.40 | 0.05 | 7.10E+06 | 6.15E-05 | 8.5E-07 | 7.29E-03 | 2.8E-05 | <LOD    |         | 137.2 | 1.1 |  |  |  |
| #11 +0.8ng IRM | 5.8  | 0.80 | 0.05 | 1.10E+07 | 5.64E-05 | 1.0E-06 | 7.26E-03 | 4.0E-05 | <LOD    |         | 137.7 | 1.5 |  |  |  |
| #12 +1.2ng IRM | 9.8  | 1.20 | 0.05 | 1.59E+07 | 5.56E-05 | 7.3E-07 | 7.27E-03 | 2.7E-05 | <LOD    |         | 137.5 | 1.0 |  |  |  |
| #13            | 0.9  | 0.00 | 0.05 | 1.53E+06 | 7.32E-05 | 3.5E-06 | 7.25E-03 | 4.6E-05 | <LOD    |         | 138.0 | 1.7 |  |  |  |
| #14 +0.4ng IRM | 4.6  | 0.40 | 0.05 | 3.12E+06 | 6.56E-05 | 2.6E-06 | 7.28E-03 | 3.7E-05 | <LOD    |         | 137.3 | 1.4 |  |  |  |
| #16            | 1.9  | 0.00 | 0.05 | 2.38E+06 | 6.80E-05 | 2.3E-06 | 7.27E-03 | 3.1E-05 | <LOD    |         | 137.6 | 1.2 |  |  |  |

Note ##. 1, 2 twins; 2, 57 Seabees; 3, 97 from National Sample

Note φφ. -1, not deployed; 0, deployed controls without GWI; 1, GWI Syndrome 1; 2, GWI Syndrome 2; 3, GWI Syndrome 3

Note \$\$\$. 1, Level 1 direct exposure; 2, Level 2 indirect exposure; 3, Level 3 incidental exposure; 4, no exposure
