# Supplementary material for: Resolving whether inhalation of depleted uranium contributed to Gulf War Illness using high-sensitivity mass spectrometry
Source: PubMed Central journal article supplement (PMC7893152; doi:10.1038/s41598-021-82535-3), 2021-02-18
Supplement: 41598_2021_82535_MOESM3_ESM.pdf [file 41598_2021_82535_MOESM3_ESM.pdf]

| Table S4. U isotope measurements of 2ppb 1% <sup>233</sup> U-doped IRMM184 uranium solution |                      |                                     |         |                                     |         |                                     |         |                      |                                     |        |
|---------------------------------------------------------------------------------------------|----------------------|-------------------------------------|---------|-------------------------------------|---------|-------------------------------------|---------|----------------------|-------------------------------------|--------|
| Sample Name                                                                                 | 238U intensity (cps) | <sup>234</sup> U / <sup>238</sup> U | ±       | <sup>235</sup> U / <sup>238</sup> U | ±       | <sup>236</sup> U / <sup>238</sup> U | ±       | <sup>236</sup> U cps | <sup>238</sup> U / <sup>235</sup> U | ± 2 SE |
| IRMM184+1%233U                                                                              | 3.8E+07              | 5.419E-05                           | 2.7E-07 | 7.258E-03                           | 1.1E-05 | 1.3E-07                             | 9.9E-08 | 3.8                  | 137.78                              | 0.40   |
| IRMM184+1%233U                                                                              | 3.7E+07              | 5.468E-05                           | 2.3E-07 | 7.259E-03                           | 1.1E-05 | 1.3E-07                             | 9.9E-08 | 3.7                  | 137.76                              | 0.40   |
| IRMM184+1%233U                                                                              | 3.6E+07              | 5.522E-05                           | 2.5E-07 | 7.259E-03                           | 1.1E-05 | 1.3E-07                             | 8.5E-08 | 3.1                  | 137.75                              | 0.40   |
| IRMM184+1%233U                                                                              | 1.5E+07              | 5.545E-05                           | 6.3E-07 | 7.273E-03                           | 1.1E-05 | 3.4E-07                             | 2.5E-07 | 3.6                  | 137.49                              | 0.43   |
| IRMM184+1%233U                                                                              | 2.4E+07              | 5.458E-05                           | 3.7E-07 | 7.269E-03                           | 1.0E-05 | 2.0E-07                             | 1.4E-07 | 3.3                  | 137.58                              | 0.40   |
| IRMM184+1%233U                                                                              | 5.4E+07              | 5.410E-05                           | 4.4E-07 | 7.262E-03                           | 2.1E-05 | 8.6E-08                             | 1.5E-07 | 7.9                  | 137.71                              | 0.78   |
| IRMM184+1%233U                                                                              | 5.3E+07              | 5.433E-05                           | 4.0E-07 | 7.260E-03                           | 2.1E-05 | 8.9E-08                             | 6.7E-08 | 3.5                  | 137.74                              | 0.78   |
| IRMM184+1%233U                                                                              | 4.4E+07              | 5.498E-05                           | 4.7E-07 | 7.257E-03                           | 2.1E-05 | 1.1E-07                             | 1.4E-07 | 6.0                  | 137.80                              | 0.79   |
| IRMM184+1%233U                                                                              | 4.5E+07              | 5.428E-05                           | 3.8E-07 | 7.265E-03                           | 2.0E-05 | 1.0E-07                             | 8.2E-08 | 3.7                  | 137.64                              | 0.76   |
| IRMM184+1%233U                                                                              | 3.9E+07              | 5.448E-05                           | 3.9E-07 | 7.268E-03                           | 2.0E-05 | 1.2E-07                             | 9.7E-08 | 3.8                  | 137.59                              | 0.77   |
| IRMM184+1%233U                                                                              | 3.9E+07              | 5.385E-05                           | 4.1E-07 | 7.261E-03                           | 2.0E-05 | 1.2E-07                             | 1.5E-07 | 5.9                  | 137.72                              | 0.76   |
| IRMM184+1%233U                                                                              | 8.5E+07              | 5.252E-05                           | 3.7E-07 | 7.252E-03                           | 1.6E-05 | 5.3E-08                             | 8.2E-08 | 7.0                  | 137.89                              | 0.60   |
| IRMM184+1%233U                                                                              | 8.5E+07              | 5.276E-05                           | 3.7E-07 | 7.260E-03                           | 1.4E-05 | 5.3E-08                             | 6.8E-08 | 5.8                  | 137.73                              | 0.54   |
| IRMM184+1%233U                                                                              | 8.8E+07              | 5.298E-05                           | 3.7E-07 | 7.256E-03                           | 1.4E-05 | 5.1E-08                             | 5.2E-08 | 4.6                  | 137.83                              | 0.52   |
| IRMM184+1%233U                                                                              | 8.8E+07              | 5.304E-05                           | 3.6E-07 | 7.255E-03                           | 1.4E-05 | 5.1E-08                             | 7.0E-08 | 6.2                  | 137.83                              | 0.53   |
| IRMM184+1%233U                                                                              | 9.0E+07              | 5.201E-05                           | 4.0E-07 | 7.257E-03                           | 1.4E-05 | 5.0E-08                             | 5.5E-08 | 4.9                  | 137.79                              | 0.51   |
| IRMM184+1%233U                                                                              | 8.9E+07              | 5.230E-05                           | 3.4E-07 | 7.257E-03                           | 1.4E-05 | 5.0E-08                             | 6.7E-08 | 5.9                  | 137.80                              | 0.53   |
| IRMM184+1%233U                                                                              | 8.7E+07              | 5.276E-05                           | 3.3E-07 | 7.265E-03                           | 1.2E-05 | 5.1E-08                             | 6.0E-08 | 5.2                  | 137.65                              | 0.46   |
| IRMM184+1%233U                                                                              | 8.9E+07              | 5.227E-05                           | 3.5E-07 | 7.270E-03                           | 1.4E-05 | 5.0E-08                             | 5.5E-08 | 4.9                  | 137.55                              | 0.52   |
| IRMM184+1%233U                                                                              | 8.7E+07              | 5.316E-05                           | 3.1E-07 | 7.265E-03                           | 1.4E-05 | 5.1E-08                             | 9.1E-08 | 7.9                  | 137.64                              | 0.51   |
| IRMM184+1%233U                                                                              | 8.3E+07              | 5.281E-05                           | 3.2E-07 | 7.265E-03                           | 1.2E-05 | 5.4E-08                             | 5.1E-08 | 4.2                  | 137.64                              | 0.47   |
| IRMM184+1%233U                                                                              | 4.9E+07              | 5.207E-05                           | 7.3E-07 | 7.271E-03                           | 1.4E-05 | 9.6E-08                             | 7.9E-08 | 3.9                  | 137.54                              | 0.52   |
| IRMM184+1%233U                                                                              | 4.8E+07              | 5.290E-05                           | 7.4E-07 | 7.257E-03                           | 1.2E-05 | 9.9E-08                             | 1.1E-07 | 5.1                  | 137.79                              | 0.44   |
| IRMM184+1%233U                                                                              | 7.2E+07              | 5.403E-05                           | 7.6E-07 | 7.259E-03                           | 1.2E-05 | 6.3E-08                             | 9.3E-08 | 6.7                  | 137.77                              | 0.44   |
| IRMM184+1%233U                                                                              | 3.3E+07              | 5.449E-05                           | 5.5E-07 | 7.266E-03                           | 3.0E-05 | 1.5E-07                             | 9.1E-08 | 3.0                  | 137.62                              | 1.15   |
| IRMM184+1%233U                                                                              | 2.8E+07              | 5.417E-05                           | 5.7E-07 | 7.262E-03                           | 3.0E-05 | 1.7E-07                             | 1.4E-07 | 3.8                  | 137.70                              | 1.14   |
| IRMM184+1%233U                                                                              | 2.8E+07              | 5.317E-05                           | 6.4E-07 | 7.255E-03                           | 3.0E-05 | 1.7E-07                             | 1.1E-07 | 3.2                  | 137.83                              | 1.16   |
| IRMM184+1%233U                                                                              | 3.3E+07              | 5.358E-05                           | 5.4E-07 | 7.258E-03                           | 3.0E-05 | 1.5E-07                             | 1.1E-07 | 3.5                  | 137.78                              | 1.14   |
| IRMM184+1%233U                                                                              | 3.2E+07              | 5.391E-05                           | 4.8E-07 | 7.263E-03                           | 3.0E-05 | 1.5E-07                             | 1.5E-07 | 4.9                  | 137.68                              | 1.13   |
| IRMM184+1%233U                                                                              | 2.8E+07              | 5.408E-05                           | 5.0E-07 | 7.257E-03                           | 3.0E-05 | 1.7E-07                             | 1.1E-07 | 3.1                  | 137.80                              | 1.13   |
| IRMM184+1%233U                                                                              | 1.9E+07              | 5.438E-05                           | 7.9E-07 | 7.270E-03                           | 3.0E-05 | 2.6E-07                             | 1.7E-07 | 3.3                  | 137.56                              | 1.13   |
| IRMM184+1%233U                                                                              | 1.9E+07              | 5.411E-05                           | 5.2E-07 | 7.263E-03                           | 3.0E-05 | 2.6E-07                             | 1.9E-07 | 3.6                  | 137.68                              | 1.14   |
| IRMM184+1%233U                                                                              | 2.0E+07              | 5.347E-05                           | 6.0E-07 | 7.262E-03                           | 3.1E-05 | 2.5E-07                             | 2.0E-07 | 3.9                  | 137.71                              | 1.18   |
| IRMM184+1%233U                                                                              | 2.1E+07              | 5.410E-05                           | 5.7E-07 | 7.258E-03                           | 3.0E-05 | 2.3E-07                             | 2.0E-07 | 4.1                  | 137.77                              | 1.14   |
| IRMM184+1%233U                                                                              | 2.0E+07              | 5.345E-05                           | 6.4E-07 | 7.269E-03                           | 3.1E-05 | 2.4E-07                             | 2.0E-07 | 4.0                  | 137.57                              | 1.15   |
| IRMM184+1%233U                                                                              | 3.0E+07              | 5.208E-05                           | 6.6E-07 | 7.263E-03                           | 3.3E-05 | 1.6E-07                             | 1.4E-07 | 4.1                  | 137.68                              | 1.25   |
| IRMM184+1%233U                                                                              | 3.0E+07              | 5.362E-05                           | 5.4E-07 | 7.230E-03                           | 3.3E-05 | 1.6E-07                             | 2.0E-07 | 6.0                  | 138.30                              | 1.25   |
| IRMM184+1%233U                                                                              | 3.0E+07              | 5.426E-05                           | 5.8E-07 | 7.245E-03                           | 3.3E-05 | 1.6E-07                             | 1.9E-07 | 5.7                  | 138.02                              | 1.25   |
| IRMM184+1%233U                                                                              | 3.4E+07              | 5.318E-05                           | 5.8E-07 | 7.275E-03                           | 3.3E-05 | 1.4E-07                             | 1.2E-07 | 4.1                  | 137.45                              | 1.26   |
| IRMM184+1%233U                                                                              | 1.1E+07              | 5.255E-05                           | 7.0E-07 | 7.301E-03                           | 3.4E-05 | 4.4E-07                             | 2.9E-07 | 3.3                  | 136.97                              | 1.27   |
| IRMM184+1%233U                                                                              | 4.1E+07              | 5.408E-05                           | 5.6E-07 | 7.247E-03                           | 3.3E-05 | 1.2E-07                             | 7.5E-08 | 3.1                  | 137.99                              | 1.26   |
| IRMM184+1%233U                                                                              | 4.0E+07              | 5.329E-05                           | 6.2E-07 | 7.256E-03                           | 3.3E-05 | 1.2E-07                             | 1.1E-07 | 4.4                  | 137.82                              | 1.25   |
| IRMM184+1%233U                                                                              | 3.0E+07              | 5.443E-05                           | 5.6E-07 | 7.262E-03                           | 3.3E-05 | 1.6E-07                             | 1.2E-07 | 3.7                  | 137.70                              | 1.25   |
| IRMM184+1%233U                                                                              | 2.9E+07              | 5.371E-05                           | 5.8E-07 | 7.273E-03                           | 3.3E-05 | 1.7E-07                             | 1.5E-07 | 4.4                  | 137.49                              | 1.25   |
| IRMM184+1%233U                                                                              | 3.0E+07              | 5.349E-05                           | 5.7E-07 | 7.269E-03                           | 3.3E-05 | 1.6E-07                             | 1.1E-07 | 3.2                  | 137.58                              | 1.24   |
| IRMM184+1%233U                                                                              | 3.0E+07              | 5.247E-05                           | 5.6E-07 | 7.266E-03                           | 3.0E-05 | 1.6E-07                             | 1.2E-07 | 3.5                  | 137.63                              | 1.12   |
| IRMM184+1%233U                                                                              | 3.3E+07              | 5.273E-05                           | 4.8E-07 | 7.277E-03                           | 2.8E-05 | 1.5E-07                             | 1.2E-07 | 4.0                  | 137.41                              | 1.07   |
| IRMM184+1%233U                                                                              | 4.6E+07              | 5.405E-05                           | 5.2E-07 | 7.258E-03                           | 2.8E-05 | 1.0E-07                             | 6.5E-08 | 3.0                  | 137.79                              | 1.07   |
| IRMM184+1%233U                                                                              | 4.5E+07              | 5.409E-05                           | 5.7E-07 | 7.251E-03                           | 2.8E-05 | 1.0E-07                             | 8.2E-08 | 3.7                  | 137.90                              | 1.07   |
| IRMM184+1%233U                                                                              | 4.5E+07              | 5.309E-05                           | 5.9E-07 | 7.257E-03                           | 2.8E-05 | 1.1E-07                             | 1.0E-07 | 4.7                  | 137.79                              | 1.06   |
| IRMM184+1%233U                                                                              | 3.3E+07              | 5.372E-05                           | 5.7E-07 | 7.283E-03                           | 2.9E-05 | 1.5E-07                             | 1.3E-07 | 4.3                  | 137.30                              | 1.09   |
| IRMM184+1%233U                                                                              | 3.2E+07              | 5.300E-05                           | 5.5E-07 | 7.279E-03                           | 2.8E-05 | 1.5E-07                             | 9.7E-08 | 3.1                  | 137.39                              | 1.07   |
| IRMM184+1%233U                                                                              | 3.4E+07              | 5.417E-05                           | 6.5E-07 | 7.268E-03                           | 2.8E-05 | 1.4E-07                             | 1.1E-07 | 3.7                  | 137.59                              | 1.07   |
| IRMM184+1%233U                                                                              | 3.3E+07              | 5.379E-05                           | 5.5E-07 | 7.272E-03                           | 2.8E-05 | 1.5E-07                             | 1.1E-07 | 3.7                  | 137.52                              | 1.07   |
| IRMM184+1%233U                                                                              | 5.5E+07              | 5.490E-05                           | 6.1E-07 | 7.243E-03                           | 2.9E-05 | 8.6E-08                             | 7.9E-08 | 4.3                  | 138.07                              | 1.10   |
| IRMM184+1%233U                                                                              | 5.8E+07              | 5.480E-05                           | 5.0E-07 | 7.227E-03                           | 2.8E-05 | 8.1E-08                             | 8.7E-08 | 5.0                  | 138.38                              | 1.07   |
| IRMM184+1%233U                                                                              | 4.5E+07              | 5.430E-05                           | 5.2E-07 | 7.266E-03                           | 2.8E-05 | 1.1E-07                             | 9.0E-08 | 4.0                  | 137.63                              | 1.06   |
| IRMM184+1%233U                                                                              | 5.7E+07              | 5.338E-05                           | 4.6E-07 | 7.289E-03                           | 3.3E-05 | 8.2E-08                             | 9.9E-08 | 5.7                  | 137.20                              | 1.23   |

| Sample Name    | <sup>238</sup> U intensity (cps) | <sup>234</sup> U / <sup>238</sup> U | ±       | <sup>235</sup> U / <sup>238</sup> U | ±       | <sup>236</sup> U / <sup>238</sup> U | ±       | <sup>236</sup> U cps | <sup>238</sup> U / <sup>235</sup> U | ± 2 SE |
|----------------|----------------------------------|-------------------------------------|---------|-------------------------------------|---------|-------------------------------------|---------|----------------------|-------------------------------------|--------|
| IRMM184+1%233U | 5.6E+07                          | 5.421E-05                           | 5.5E-07 | 7.275E-03                           | 2.6E-05 | 8.3E-08                             | 1.3E-07 | 7.2                  | 137.46                              | 0.98   |
| IRMM184+1%233U | 5.6E+07                          | 5.335E-05                           | 4.2E-07 | 7.274E-03                           | 2.6E-05 | 8.4E-08                             | 5.1E-08 | 2.8                  | 137.48                              | 0.97   |
| IRMM184+1%233U | 5.2E+07                          | 5.378E-05                           | 4.4E-07 | 7.263E-03                           | 2.6E-05 | 9.1E-08                             | 7.5E-08 | 3.9                  | 137.69                              | 0.97   |
| IRMM184+1%233U | 5.0E+07                          | 5.387E-05                           | 4.4E-07 | 7.274E-03                           | 2.6E-05 | 9.4E-08                             | 8.9E-08 | 4.4                  | 137.48                              | 0.98   |
| IRMM184+1%233U | 5.1E+07                          | 5.400E-05                           | 5.4E-07 | 7.272E-03                           | 2.7E-05 | 9.1E-08                             | 6.4E-08 | 3.3                  | 137.51                              | 1.01   |
| IRMM184+1%233U | 5.4E+07                          | 5.430E-05                           | 4.7E-07 | 7.250E-03                           | 2.7E-05 | 8.6E-08                             | 7.7E-08 | 4.2                  | 137.93                              | 1.02   |
| IRMM184+1%233U | 5.8E+07                          | 5.420E-05                           | 5.1E-07 | 7.233E-03                           | 2.7E-05 | 8.1E-08                             | 6.9E-08 | 4.0                  | 138.25                              | 1.02   |
| IRMM184+1%233U | 5.3E+07                          | 5.475E-05                           | 4.9E-07 | 7.255E-03                           | 2.6E-05 | 8.9E-08                             | 9.6E-08 | 5.0                  | 137.84                              | 0.97   |
| IRMM184+1%233U | 5.4E+07                          | 5.426E-05                           | 4.6E-07 | 7.247E-03                           | 2.6E-05 | 8.6E-08                             | 8.3E-08 | 4.5                  | 137.98                              | 0.99   |
| IRMM184+1%233U | 5.4E+07                          | 5.492E-05                           | 5.2E-07 | 7.233E-03                           | 3.3E-05 | 8.7E-08                             | 7.7E-08 | 4.1                  | 138.25                              | 1.26   |
| IRMM184+1%233U | 4.8E+07                          | 5.346E-05                           | 4.5E-07 | 7.254E-03                           | 2.6E-05 | 9.7E-08                             | 8.5E-08 | 4.1                  | 137.85                              | 0.99   |
| IRMM184+1%233U | 4.7E+07                          | 5.442E-05                           | 5.1E-07 | 7.263E-03                           | 2.6E-05 | 1.0E-07                             | 7.3E-08 | 3.5                  | 137.68                              | 0.98   |
| IRMM184+1%233U | 4.8E+07                          | 5.405E-05                           | 5.1E-07 | 7.288E-03                           | 4.2E-05 | 9.8E-08                             | 8.6E-08 | 4.1                  | 137.20                              | 1.59   |
| IRMM184+1%233U | 4.9E+07                          | 5.170E-05                           | 1.7E-06 | 7.287E-03                           | 3.6E-05 | 9.6E-08                             | 8.1E-08 | 4.0                  | 137.24                              | 1.35   |
| IRMM184+1%233U | 4.8E+07                          | 5.199E-05                           | 1.7E-06 | 7.279E-03                           | 3.5E-05 | 9.8E-08                             | 5.8E-08 | 2.8                  | 137.38                              | 1.33   |
| IRMM184+1%233U | 4.0E+07                          | 5.237E-05                           | 1.7E-06 | 7.262E-03                           | 3.6E-05 | 1.2E-07                             | 1.1E-07 | 4.5                  | 137.70                              | 1.35   |
| IRMM184+1%233U | 4.1E+07                          | 5.202E-05                           | 1.7E-06 | 7.273E-03                           | 3.5E-05 | 1.2E-07                             | 1.1E-07 | 4.6                  | 137.49                              | 1.33   |
| IRMM184+1%233U | 4.3E+07                          | 5.235E-05                           | 1.7E-06 | 7.281E-03                           | 3.7E-05 | 1.1E-07                             | 1.1E-07 | 4.7                  | 137.34                              | 1.39   |
| IRMM184+1%233U | 4.0E+07                          | 5.244E-05                           | 1.7E-06 | 7.285E-03                           | 3.6E-05 | 1.2E-07                             | 9.1E-08 | 3.7                  | 137.27                              | 1.34   |
| IRMM184+1%233U | 4.0E+07                          | 5.241E-05                           | 1.7E-06 | 7.267E-03                           | 3.6E-05 | 1.2E-07                             | 9.3E-08 | 3.8                  | 137.61                              | 1.37   |
| IRMM184+1%233U | 4.1E+07                          | 5.251E-05                           | 1.7E-06 | 7.269E-03                           | 3.5E-05 | 1.2E-07                             | 8.3E-08 | 3.4                  | 137.57                              | 1.33   |
| IRMM184+1%233U | 6.0E+07                          | 5.538E-05                           | 1.8E-06 | 7.235E-03                           | 3.5E-05 | 7.7E-08                             | 8.6E-08 | 5.2                  | 138.21                              | 1.33   |
| IRMM184+1%233U | 6.0E+07                          | 5.449E-05                           | 1.8E-06 | 7.233E-03                           | 3.5E-05 | 7.7E-08                             | 6.9E-08 | 4.1                  | 138.25                              | 1.34   |
| IRMM184+1%233U | 5.3E+07                          | 5.527E-05                           | 1.8E-06 | 7.238E-03                           | 3.5E-05 | 8.9E-08                             | 7.9E-08 | 4.2                  | 138.16                              | 1.33   |
| IRMM184+1%233U | 5.4E+07                          | 5.592E-05                           | 1.8E-06 | 7.236E-03                           | 3.5E-05 | 8.6E-08                             | 1.0E-07 | 5.6                  | 138.19                              | 1.34   |
| IRMM184+1%233U | 6.4E+07                          | 5.197E-05                           | 6.8E-07 | 7.259E-03                           | 1.7E-05 | 7.2E-08                             | 7.2E-08 | 4.6                  | 137.76                              | 0.63   |
| IRMM184+1%233U | 6.5E+07                          | 5.250E-05                           | 6.4E-07 | 7.272E-03                           | 1.7E-05 | 7.0E-08                             | 7.6E-08 | 5.0                  | 137.52                              | 0.65   |
| IRMM184+1%233U | 6.6E+07                          | 5.249E-05                           | 6.8E-07 | 7.260E-03                           | 1.7E-05 | 7.0E-08                             | 6.8E-08 | 4.5                  | 137.73                              | 0.66   |
| IRMM184+1%233U | 5.8E+07                          | 5.212E-05                           | 7.2E-07 | 7.259E-03                           | 1.7E-05 | 8.0E-08                             | 7.8E-08 | 4.5                  | 137.75                              | 0.65   |
| IRMM184+1%233U | 5.2E+07                          | 5.239E-05                           | 6.7E-07 | 7.265E-03                           | 1.6E-05 | 9.1E-08                             | 1.1E-07 | 5.8                  | 137.64                              | 0.61   |
| IRMM184+1%233U | 4.7E+07                          | 5.376E-05                           | 6.8E-07 | 7.263E-03                           | 2.7E-05 | 1.0E-07                             | 8.4E-08 | 4.0                  | 137.69                              | 1.03   |
| IRMM184+1%233U | 4.7E+07                          | 5.335E-05                           | 7.0E-07 | 7.257E-03                           | 1.6E-05 | 1.0E-07                             | 1.1E-07 | 5.1                  | 137.80                              | 0.63   |
| IRMM184+1%233U | 5.3E+07                          | 5.254E-05                           | 3.4E-07 | 7.273E-03                           | 2.6E-05 | 8.8E-08                             | 8.9E-08 | 4.7                  | 137.49                              | 0.97   |
| IRMM184+1%233U | 5.3E+07                          | 5.204E-05                           | 3.6E-07 | 7.261E-03                           | 2.7E-05 | 8.8E-08                             | 1.3E-07 | 6.7                  | 137.73                              | 1.01   |
| IRMM184+1%233U | 4.9E+07                          | 5.238E-05                           | 4.5E-07 | 7.257E-03                           | 2.6E-05 | 9.7E-08                             | 7.6E-08 | 3.7                  | 137.80                              | 0.99   |
| IRMM184+1%233U | 5.0E+07                          | 5.309E-05                           | 4.2E-07 | 7.255E-03                           | 2.6E-05 | 9.4E-08                             | 7.9E-08 | 4.0                  | 137.84                              | 0.97   |
| IRMM184+1%233U | 4.1E+07                          | 5.254E-05                           | 4.0E-07 | 7.264E-03                           | 2.6E-05 | 1.2E-07                             | 1.1E-07 | 4.4                  | 137.67                              | 0.97   |
| IRMM184+1%233U | 4.0E+07                          | 5.193E-05                           | 5.3E-07 | 7.264E-03                           | 2.6E-05 | 1.2E-07                             | 8.6E-08 | 3.5                  | 137.67                              | 0.97   |
| IRMM184+1%233U | 1.2E+07                          | 5.186E-05                           | 5.7E-07 | 7.235E-03                           | 1.1E-05 | 4.0E-07                             | 2.6E-07 | 3.2                  | 138.21                              | 0.42   |
| IRMM184+1%233U | 1.2E+07                          | 5.316E-05                           | 5.2E-07 | 7.254E-03                           | 1.5E-05 | 4.0E-07                             | 2.6E-07 | 3.2                  | 137.86                              | 0.57   |
| IRMM184+1%233U | 1.2E+07                          | 5.338E-05                           | 4.3E-07 | 7.261E-03                           | 1.2E-05 | 4.1E-07                             | 2.8E-07 | 3.4                  | 137.72                              | 0.45   |
| IRMM184+1%233U | 5.4E+07                          | 5.216E-05                           | 1.7E-07 | 7.256E-03                           | 9.7E-06 | 8.6E-08                             | 1.2E-07 | 6.5                  | 137.83                              | 0.37   |
| IRMM184+1%233U | 5.5E+07                          | 5.226E-05                           | 2.7E-07 | 7.262E-03                           | 9.1E-06 | 8.4E-08                             | 6.6E-08 | 3.7                  | 137.70                              | 0.35   |
| IRMM184+1%233U | 5.6E+07                          | 5.243E-05                           | 3.5E-07 | 7.255E-03                           | 8.5E-06 | 8.4E-08                             | 1.2E-07 | 6.4                  | 137.84                              | 0.32   |
| IRMM184+1%233U | 5.3E+07                          | 5.251E-05                           | 4.3E-07 | 7.271E-03                           | 1.8E-05 | 8.9E-08                             | 1.2E-07 | 6.3                  | 137.53                              | 0.67   |
| IRMM184+1%233U | 5.2E+07                          | 5.175E-05                           | 2.3E-07 | 7.263E-03                           | 1.1E-05 | 9.0E-08                             | 7.8E-08 | 4.0                  | 137.68                              | 0.43   |
| IRMM184+1%233U | 5.3E+07                          | 5.274E-05                           | 2.7E-07 | 7.256E-03                           | 9.5E-06 | 8.9E-08                             | 1.1E-07 | 5.7                  | 137.81                              | 0.36   |
| IRMM184+1%233U | 5.3E+07                          | 5.285E-05                           | 3.7E-07 | 7.272E-03                           | 9.8E-06 | 8.9E-08                             | 9.3E-08 | 4.9                  | 137.52                              | 0.37   |
| IRMM184+1%233U | 5.4E+07                          | 5.270E-05                           | 3.2E-07 | 7.261E-03                           | 8.9E-06 | 8.6E-08                             | 1.1E-07 | 6.0                  | 137.72                              | 0.34   |
| IRMM184+1%233U | 5.4E+07                          | 5.320E-05                           | 2.5E-07 | 7.264E-03                           | 8.5E-06 | 8.7E-08                             | 7.6E-08 | 4.1                  | 137.67                              | 0.32   |
| IRMM184+1%233U | 3.0E+07                          | 5.601E-05                           | 4.0E-07 | 7.221E-03                           | 4.0E-05 | 1.6E-07                             | 1.1E-07 | 3.1                  | 138.49                              | 1.52   |
| IRMM184+1%233U | 2.8E+07                          | 5.595E-05                           | 4.8E-07 | 7.255E-03                           | 4.0E-05 | 1.7E-07                             | 1.5E-07 | 4.1                  | 137.84                              | 1.52   |
| IRMM184+1%233U | 2.9E+07                          | 5.633E-05                           | 6.7E-07 | 7.251E-03                           | 3.9E-05 | 1.6E-07                             | 1.6E-07 | 4.8                  | 137.92                              | 1.50   |
| IRMM184+1%233U | 3.9E+07                          | 5.315E-05                           | 2.9E-07 | 7.236E-03                           | 3.9E-05 | 1.2E-07                             | 9.6E-08 | 3.7                  | 138.20                              | 1.51   |
| IRMM184+1%233U | 3.3E+07                          | 5.320E-05                           | 5.6E-07 | 7.271E-03                           | 4.0E-05 | 1.4E-07                             | 8.8E-08 | 3.0                  | 137.53                              | 1.50   |
| IRMM184+1%233U | 3.2E+07                          | 5.294E-05                           | 3.5E-07 | 7.249E-03                           | 3.9E-05 | 1.5E-07                             | 1.5E-07 | 4.7                  | 137.94                              | 1.49   |
| IRMM184+1%233U | 2.6E+07                          | 5.440E-05                           | 3.5E-07 | 7.270E-03                           | 4.1E-05 | 1.9E-07                             | 1.4E-07 | 3.6                  | 137.55                              | 1.56   |
| IRMM184+1%233U | 2.5E+07                          | 5.418E-05                           | 4.3E-07 | 7.274E-03                           | 4.1E-05 | 1.9E-07                             | 1.5E-07 | 3.7                  | 137.47                              | 1.54   |
| IRMM184+1%233U | 2.2E+07                          | 5.443E-05                           | 4.8E-07 | 7.272E-03                           | 4.0E-05 | 2.2E-07                             | 2.4E-07 | 5.2                  | 137.51                              | 1.50   |
| IRMM184+1%233U | 5.8E+07                          | 5.217E-05                           | 5.1E-07 | 7.263E-03                           | 1.6E-05 | 8.0E-08                             | 5.2E-08 | 3.1                  | 137.68                              | 0.60   |

| Sample Name    | 238U intensity (cps) | $^{234}\text{U} / ^{238}\text{U}$ | $\pm$   | $^{235}\text{U} / ^{238}\text{U}$ | $\pm$   | $^{236}\text{U} / ^{238}\text{U}$ | $\pm$   | $^{236}\text{U}$ cps | $^{238}\text{U} / ^{235}\text{U}$ | $\pm 2$ SE |
|----------------|----------------------|-----------------------------------|---------|-----------------------------------|---------|-----------------------------------|---------|----------------------|-----------------------------------|------------|
| IRMM184+1%233U | 5.9E+07              | 5.227E-05                         | 3.9E-07 | 7.261E-03                         | 1.4E-05 | 7.9E-08                           | 5.9E-08 | 3.5                  | 137.71                            | 0.53       |
| IRMM184+1%233U | 6.0E+07              | 5.507E-05                         | 2.3E-06 | 7.297E-03                         | 3.8E-05 | 7.7E-08                           | 7.9E-08 | 4.7                  | 137.03                            | 1.44       |
| IRMM184+1%233U | 6.1E+07              | 5.520E-05                         | 2.3E-06 | 7.299E-03                         | 3.7E-05 | 7.6E-08                           | 5.1E-08 | 3.1                  | 137.01                            | 1.38       |
| IRMM184+1%233U | 5.8E+07              | 5.408E-05                         | 2.2E-06 | 7.253E-03                         | 4.1E-05 | 8.0E-08                           | 5.3E-08 | 3.1                  | 137.88                            | 1.58       |
| IRMM184+1%233U | 5.6E+07              | 5.467E-05                         | 2.2E-06 | 7.242E-03                         | 3.9E-05 | 8.3E-08                           | 6.3E-08 | 3.5                  | 138.09                            | 1.50       |
| IRMM184+1%233U | 5.7E+07              | 5.054E-05                         | 2.1E-06 | 7.224E-03                         | 4.3E-05 | 8.1E-08                           | 7.5E-08 | 4.3                  | 138.44                            | 1.65       |
| IRMM184+1%233U | 5.6E+07              | 5.120E-05                         | 2.1E-06 | 7.263E-03                         | 3.8E-05 | 8.4E-08                           | 6.8E-08 | 3.8                  | 137.69                            | 1.43       |
| IRMM184+1%233U | 5.7E+07              | 5.048E-05                         | 2.1E-06 | 7.258E-03                         | 3.7E-05 | 8.1E-08                           | 6.7E-08 | 3.8                  | 137.78                            | 1.40       |

Notes: all uncertainties are  $1\sigma$  unless otherwise noted; variations in intensity reflect solution uptake and instrument sensitivity variations
